# Supplementary material for: Short- and long-term use of medication for psychological distress after the diagnosis of cancer
Source: Springer Nature journal article supplement (doi:10.1007/s00520-016-3456-z), 2016-10-26
Supplement: MOESM2 [file 10985870]

**Supplemental Table S2.1** Factors associated with persistent regular use of psychotropic medications in the five 180-day periods after the diagnosis of cancer, for male patients who survived 2.5 years

| Explanatory variables | OR |  | 95%CI | | |
| --- | --- | --- | --- | --- | --- |
| The type of cancer at diagnosis (reference : skin cancer) | | | | | |
| Colon cancer | 1.538 |  | 0.743 | － | 3.182 |
| **Oral cancer** | 3.120 | ** | 1.444 | － | 6.742 |
| **Prostate cancer** | 2.742 | ** | 1.327 | － | 5.667 |
| Liver cancer | 1.849 |  | 0.875 | － | 3.906 |
| Stomach cancer | 1.894 |  | 0.854 | － | 4.203 |
| **Lung cancer** | 3.765 | *** | 1.817 | － | 7.802 |
| Age in years (reference: <35) |  |  |  |  |  |
| 35-44 | 1.786 |  | 0.699 | － | 4.567 |
| 45-54 | 2.456 |  | 0.992 | － | 6.079 |
| 55-64 | 2.440 |  | 0.984 | － | 6.050 |
| 65-74 | 2.457 |  | 0.982 | － | 6.145 |
| 75-84 | 1.676 |  | 0.650 | － | 4.325 |
| ≧85 | 2.051 |  | 0.666 | － | 6.318 |
| Region of the NHI registration location at the onset of cancer (reference: East) | | | | | |
| Taipei region | 1.069 |  | 0.621 | － | 1.839 |
| North except Taipei | 0.694 |  | 0.391 | － | 1.232 |
| Central | 1.013 |  | 0.590 | － | 1.737 |
| South | 0.772 |  | 0.448 | － | 1.332 |
| The farthest south (Kaohsiung and Ping-Tung) | 0.642 |  | 0.366 | － | 1.127 |
| Urbanization level of the NHI registration location at the onset of cancer (reference: remote or rural area) | | | | | |
| Big city | 0.980 |  | 0.714 | － | 1.345 |
| Small city or town | 1.247 |  | 0.940 | － | 1.654 |
| Occupation type in the NHI registry at the onset of cancer (reference: NHI registration through farmers/ fishermen/ crewmen unions) | | | | | |
| Government employee or teacher | 0.728 |  | 0.421 | － | 1.259 |
| NHI registration through employers of other types | 0.822 |  | 0.556 | － | 1.215 |
| NHI registration through labor unions | 0.872 |  | 0.608 | － | 1.252 |
| Veterans or their dependants | 0.665 |  | 0.251 | － | 1.765 |
| Family dependents with no jobs | 0.183 |  | 0.025 | － | 1.351 |
| NHI registration through local governments | 0.912 |  | 0.593 | － | 1.404 |
| Members of families in poverty / residents in religious or charitable institutions | 1.397 |  | 0.516 | － | 3.787 |
|  |  |  |  |  |
| Salary class in the NHI registry at the onset of cancer (reference: the bottom tertile of the population) | | | | | |
| The middle tertile | 0.856 |  | 0.612 | － | 1.198 |
| The top tertile | 0.787 |  | 0.576 | － | 1.075 |
| Comorbidity (reference: none) | | | | | |
| **Some comorbidity** | 1.346 | ** | 1.103 | － | 1.641 |
| # observations | 10,640 | | |  |  |
| Log-likelihood ratio test statistic for model significance | Waldχ2 (29) = 131.10*** | | |  | |
| * p<0.05，**p<0.01，***p<0.001。 | | | |  |  |
| Abbreviations: CI, confidence interval; OR, odds ratio. | | | | | |

**Supplemental Table S2.2** Factors associated with persistent regular use of psychotropic medication in the five 180-day periods after the diagnosis of cancer, for female patients who survived 2.5 years

| Explanatory variables | OR |  | 95%CI | | |
| --- | --- | --- | --- | --- | --- |
| The onset of cancer diagnosisa (reference : skin cancer) | | | | | |
| Breast cancer | 1.895 |  | 0.808 | － | 4.444 |
| Colon cancer | 2.042 |  | 0.871 | － | 4.788 |
| Cervical cancer | 1.793 |  | 0.740 | － | 4.340 |
| Uterus cancer | 1.646 |  | 0.631 | － | 4.292 |
| **Lung cancer** | 3.658 | ** | 1.487 | － | 8.998 |
| Liver cancer | 2.493 |  | 0.994 | － | 6.252 |
| Stomach cancer | 2.028 |  | 0.757 | － | 5.434 |
| Age in years (reference: <35) |  |  |  |  |  |
| 35-44 | 1.455 |  | 0.757 | － | 2.797 |
| 45-54 | 1.948 | * | 1.044 | － | 3.635 |
| 55-64 | 1.440 |  | 0.755 | － | 2.748 |
| 65-74 | 1.658 |  | 0.854 | － | 3.222 |
| 75-84 | 1.440 |  | 0.700 | － | 2.963 |
| ≧85 | 1.869 |  | 0.657 | － | 5.316 |
| Region of the NHI registration location at the onset of cancer (reference: East) | | | | | |
| Taipei region | 1.190 |  | 0.599 | － | 2.365 |
| North except Taipei | 0.635 |  | 0.308 | － | 1.309 |
| Central | 0.816 |  | 0.408 | － | 1.632 |
| South | 0.909 |  | 0.453 | － | 1.823 |
| The farthest south (Kaohsiung and Ping-Tung) | 0.652 |  | 0.318 | － | 1.334 |
| Urbanization level of the NHI registration location at the onset of cancer (reference: remote or rural area) | | | | | |
| Big city | 0.751 |  | 0.509 | － | 1.107 |
| Small city or town | 0.886 |  | 0.617 | － | 1.272 |
| Occupation type in the NHI registry at the onset of cancer (reference: NHI registration through farmers/ fishermen/ crewmen unions) | | | | | |
| Government employee or teacher | 0.633 |  | 0.340 | － | 1.181 |
| NHI registration through employers of other types | 1.090 |  | 0.733 | － | 1.621 |
| NHI registration through labor unions | 1.039 |  | 0.691 | － | 1.562 |
| Veterans or their dependants | 0.410 |  | 0.055 | － | 3.047 |
| Family dependents with no jobs | 1.225 |  | 0.511 | － | 2.937 |
| NHI registration through local governments | 1.030 |  | 0.660 | － | 1.607 |
| Members of families in poverty / residents in religious or charitable institutions | 0.387 |  | 0.052 | － | 2.897 |
|  |  |  |  |  |
| Salary class in the NHI registry at the onset of cancer (reference: bottom tertile of the population) | | | | | |
| **The middle tertile** | 0.654 | ** | 0.484 | － | 0.885 |
| **The top tertile** | 0.698 | * | 0.508 | － | 0.958 |
| Comorbidity (reference: none) | | | | | |
| **Some comorbidity** | 1.361 | * | 1.074 | － | 1.725 |
| # observations | 10,804 | | |  |  |
| Log-likelihood ratio test statistic for model significance | Wald χ2 (30) = 83.99*** | | |  |  |
| * p<0.05; **p<0.01; ***p<0.001. | | | |  |  |
| Abbreviations: CI, confidence interval; OR, odds ratio. | | | | | |
| a Because the sample size of female oral cancer patients surviving 2.5 years was relatively small, we excluded these patients from the multivariable analysis. | | | | | |
